# Supplementary material
Source: Springer Nature journal article supplement (https://www.springermedizin.de/resource/supplementary/12968_2009_960_MOESM4_ESM.pdf/9580050)

## Positive LR (95% CI)

|                    |       |                   |
|--------------------|-------|-------------------|
| Schwitter (2001)   | 4.32  | (1.24 - 15.03)    |
| Doyle (2003)       | 2.60  | (1.68 - 4.04)     |
| Ishida (2003)      | 6.05  | (2.44 - 14.99)    |
| Nagel (2003)       | 9.06  | (3.55 - 23.12)    |
| Giang (2004)       | 6.07  | (1.67 - 22.06)    |
| Kawase (2004)      | 15.97 | (2.38 - 107.14)   |
| Paetsch (2004)     | 2.35  | (1.44 - 3.86)     |
| Plein (2004)       | 5.25  | (1.48 - 18.68)    |
| Takase (2004)      | 6.07  | (2.46 - 14.99)    |
| Thiele (2004)      | 24.00 | (3.45 - 167.16)   |
| Plein (2005)       | 3.38  | (1.69 - 6.76)     |
| Sakuma (2005)      | 2.56  | (1.28 - 5.13)     |
| Cury (2006)        | 2.61  | (1.29 - 5.31)     |
| Klem (2006)        | 2.00  | (1.42 - 2.82)     |
| Pilz (2006)        | 5.59  | (3.18 - 9.84)     |
| Merkle (2007)      | 3.43  | (2.38 - 4.94)     |
| Cheng (2007)       | 2.70  | (1.46 - 4.99)     |
| Greenwood (2007)   | 10.03 | (0.69 - 146.40)   |
| Seeger (2007)      | 5.99  | (1.67 - 21.49)    |
| Gebker (2008)      | 3.10  | (1.78 - 5.40)     |
| Meyer (2008)       | 4.27  | (1.94 - 9.39)     |
| Pilz (2008)        | 90.00 | (5.69 - 1 423.43) |
| Klein (2008)       | 7.54  | (2.57 - 22.10)    |
| Klem (2008)        | 6.91  | (3.99 - 11.97)    |
| Thomas (2008)      | 5.94  | (2.64 - 13.38)    |
| Burgstahler (2008) | 4.91  | (1.59 - 15.13)    |

Random Effects Model

Pooled Positive LR = 4.18 (3.32 to 5.28)

Cochran-Q = 59.05; df = 25 (p = 0.0001)

Inconsistency (I-square) = 57.7 %

Tau-squared = 0.1731

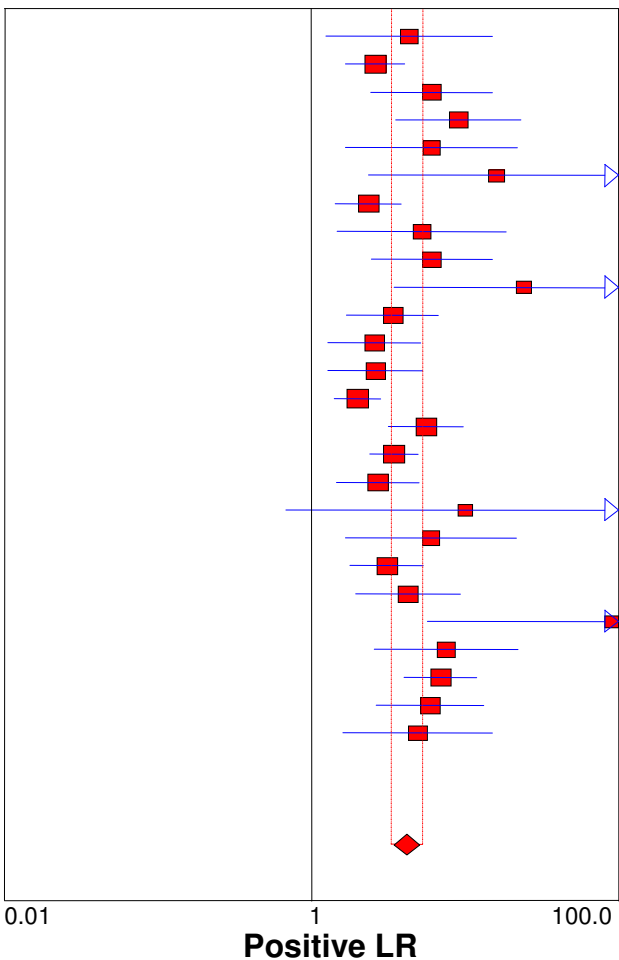

Supplement: MOESM4 [file 9580050]
